# Supplementary material
Source: publisher site journal article supplement (https://www.dovepress.com/get_supplementary_file.php?f=296367.docx)

Supplementary Material 1. Maximum Likelihood fits of 24 different nucleotide substitution models

| **Model** | **Parameters** | **BIC** | **AICc** | ***lnL*** | **(+*I*)** | **(+*G*)** | ***R*** | ***f*(A)** | ***f*(T)** | ***f*(C)** | ***f*(G)** | ***r*(AT)** | ***r*(AC)** | ***r*(AG)** | ***r*(TA)** | ***r*(TC)** | ***r*(TG)** | ***r*(CA)** | ***r*(CT)** | ***r*(CG)** | ***r*(GA)** | ***r*(GT)** | ***r*(GC)** |
| --- | --- | --- | --- | --- | --- | --- | --- | --- | --- | --- | --- | --- | --- | --- | --- | --- | --- | --- | --- | --- | --- | --- | --- |
| K2+G | 103 | 5157.849 | 4347.609 | -2070.252 | n/a | 0.39 | 3.71 | 0.250 | 0.250 | 0.250 | 0.250 | 0.027 | 0.027 | 0.197 | 0.027 | 0.197 | 0.027 | 0.027 | 0.197 | 0.027 | 0.197 | 0.027 | 0.027 |
| K2+G+I | 104 | 5167.768 | 4349.672 | -2070.273 | 0.00 | 0.39 | 3.71 | 0.250 | 0.250 | 0.250 | 0.250 | 0.027 | 0.027 | 0.197 | 0.027 | 0.197 | 0.027 | 0.027 | 0.197 | 0.027 | 0.197 | 0.027 | 0.027 |
| T92+G | 104 | 5170.113 | 4352.017 | -2071.445 | n/a | 0.38 | 3.73 | 0.236 | 0.236 | 0.264 | 0.264 | 0.025 | 0.028 | 0.208 | 0.025 | 0.208 | 0.028 | 0.025 | 0.186 | 0.028 | 0.186 | 0.025 | 0.028 |
| T92+G+I | 105 | 5179.990 | 4354.039 | -2071.445 | 0.00 | 0.38 | 3.73 | 0.236 | 0.236 | 0.264 | 0.264 | 0.025 | 0.028 | 0.208 | 0.025 | 0.208 | 0.028 | 0.025 | 0.186 | 0.028 | 0.186 | 0.025 | 0.028 |
| K2+I | 103 | 5179.999 | 4369.759 | -2081.327 | 0.54 | n/a | 3.64 | 0.250 | 0.250 | 0.250 | 0.250 | 0.027 | 0.027 | 0.196 | 0.027 | 0.196 | 0.027 | 0.027 | 0.196 | 0.027 | 0.196 | 0.027 | 0.027 |
| HKY+G | 106 | 5183.417 | 4349.611 | -2068.220 | n/a | 0.38 | 3.76 | 0.266 | 0.206 | 0.275 | 0.253 | 0.022 | 0.029 | 0.200 | 0.028 | 0.217 | 0.026 | 0.028 | 0.163 | 0.026 | 0.210 | 0.022 | 0.029 |
| TN93+G | 107 | 5189.927 | 4348.266 | -2066.536 | n/a | 0.38 | 3.75 | 0.266 | 0.206 | 0.275 | 0.253 | 0.021 | 0.029 | 0.169 | 0.028 | 0.254 | 0.026 | 0.028 | 0.191 | 0.026 | 0.177 | 0.021 | 0.029 |
| HKY+G+I | 107 | 5193.294 | 4351.633 | -2068.220 | 0.00 | 0.38 | 3.76 | 0.266 | 0.206 | 0.275 | 0.253 | 0.022 | 0.029 | 0.200 | 0.028 | 0.217 | 0.026 | 0.028 | 0.163 | 0.026 | 0.210 | 0.022 | 0.029 |
| TN93+G+I | 108 | 5199.804 | 4350.288 | -2066.536 | 0.00 | 0.38 | 3.75 | 0.266 | 0.206 | 0.275 | 0.253 | 0.021 | 0.029 | 0.169 | 0.028 | 0.254 | 0.026 | 0.028 | 0.191 | 0.026 | 0.177 | 0.021 | 0.029 |
| HKY+I | 106 | 5204.067 | 4370.260 | -2078.545 | 0.54 | n/a | 3.68 | 0.266 | 0.206 | 0.275 | 0.253 | 0.022 | 0.029 | 0.199 | 0.028 | 0.216 | 0.027 | 0.028 | 0.162 | 0.027 | 0.209 | 0.022 | 0.029 |
| GTR+G | 110 | 5211.232 | 4346.007 | -2062.373 | n/a | 0.39 | 3.07 | 0.266 | 0.206 | 0.275 | 0.253 | 0.038 | 0.035 | 0.175 | 0.050 | 0.227 | 0.021 | 0.034 | 0.170 | 0.024 | 0.184 | 0.017 | 0.026 |
| GTR+G+I | 111 | 5221.109 | 4348.030 | -2062.373 | 0.00 | 0.39 | 3.07 | 0.266 | 0.206 | 0.275 | 0.253 | 0.038 | 0.035 | 0.175 | 0.050 | 0.227 | 0.021 | 0.034 | 0.170 | 0.024 | 0.184 | 0.017 | 0.026 |
| K2 | 102 | 5313.583 | 4511.199 | -2153.057 | n/a | n/a | 3.44 | 0.250 | 0.250 | 0.250 | 0.250 | 0.028 | 0.028 | 0.194 | 0.028 | 0.194 | 0.028 | 0.028 | 0.194 | 0.028 | 0.194 | 0.028 | 0.028 |
| T92 | 103 | 5327.294 | 4517.054 | -2154.974 | n/a | n/a | 3.44 | 0.236 | 0.236 | 0.264 | 0.264 | 0.026 | 0.030 | 0.205 | 0.026 | 0.205 | 0.030 | 0.026 | 0.183 | 0.030 | 0.183 | 0.026 | 0.030 |
| T92+I | 104 | 5337.169 | 4519.074 | -2154.973 | 0.00 | n/a | 3.44 | 0.236 | 0.236 | 0.264 | 0.264 | 0.026 | 0.030 | 0.205 | 0.026 | 0.205 | 0.030 | 0.026 | 0.183 | 0.030 | 0.183 | 0.026 | 0.030 |
| HKY | 105 | 5341.557 | 4515.605 | -2152.228 | n/a | n/a | 3.44 | 0.266 | 0.206 | 0.275 | 0.253 | 0.023 | 0.031 | 0.197 | 0.030 | 0.213 | 0.028 | 0.030 | 0.160 | 0.028 | 0.206 | 0.023 | 0.031 |
| TN93 | 106 | 5348.087 | 4514.280 | -2150.555 | n/a | n/a | 3.44 | 0.266 | 0.206 | 0.275 | 0.253 | 0.023 | 0.031 | 0.174 | 0.030 | 0.240 | 0.028 | 0.030 | 0.180 | 0.028 | 0.182 | 0.023 | 0.031 |
| TN93+I | 107 | 5357.961 | 4516.299 | -2150.553 | 0.00 | n/a | 3.44 | 0.266 | 0.206 | 0.275 | 0.253 | 0.023 | 0.031 | 0.174 | 0.030 | 0.240 | 0.028 | 0.030 | 0.180 | 0.028 | 0.182 | 0.023 | 0.031 |
| GTR | 109 | 5365.615 | 4508.245 | -2144.503 | n/a | n/a | 3.13 | 0.266 | 0.206 | 0.275 | 0.253 | 0.037 | 0.038 | 0.174 | 0.047 | 0.230 | 0.024 | 0.037 | 0.173 | 0.019 | 0.182 | 0.019 | 0.020 |
| GTR+I | 110 | 5375.488 | 4510.263 | -2144.501 | 0.00 | n/a | 3.13 | 0.266 | 0.206 | 0.275 | 0.253 | 0.037 | 0.038 | 0.174 | 0.047 | 0.230 | 0.024 | 0.037 | 0.173 | 0.019 | 0.182 | 0.019 | 0.020 |
| JC+G | 102 | 5398.168 | 4595.784 | -2195.350 | n/a | 0.40 | 0.50 | 0.250 | 0.250 | 0.250 | 0.250 | 0.083 | 0.083 | 0.083 | 0.083 | 0.083 | 0.083 | 0.083 | 0.083 | 0.083 | 0.083 | 0.083 | 0.083 |
| JC+G+I | 103 | 5408.045 | 4597.805 | -2195.350 | 0.00 | 0.40 | 0.50 | 0.250 | 0.250 | 0.250 | 0.250 | 0.083 | 0.083 | 0.083 | 0.083 | 0.083 | 0.083 | 0.083 | 0.083 | 0.083 | 0.083 | 0.083 | 0.083 |
| JC+I | 102 | 5419.743 | 4617.358 | -2206.137 | 0.54 | n/a | 0.50 | 0.250 | 0.250 | 0.250 | 0.250 | 0.083 | 0.083 | 0.083 | 0.083 | 0.083 | 0.083 | 0.083 | 0.083 | 0.083 | 0.083 | 0.083 | 0.083 |
| JC | 101 | 5548.752 | 4754.224 | -2275.580 | n/a | n/a | 0.50 | 0.250 | 0.250 | 0.250 | 0.250 | 0.083 | 0.083 | 0.083 | 0.083 | 0.083 | 0.083 | 0.083 | 0.083 | 0.083 | 0.083 | 0.083 | 0.083 |

NOTE.-- Models with the lowest BIC scores (Bayesian Information Criterion) are considered to describe the substitution pattern the best. For each model, AICc value (Akaike Information Criterion, corrected), Maximum Likelihood value (*lnL*), and the number of parameters (including branch lengths) are also presented [1]. Non-uniformity of evolutionary rates among sites may be modeled by using a discrete Gamma distribution (+*G*) with 5 rate categories and by assuming that a certain fraction of sites are evolutionarily invariable (+*I*). Whenever applicable, estimates of gamma shape parameter and/or the estimated fraction of invariant sites are shown. Assumed or estimated values of transition/transversion bias (*R*) are shown for each model, as well. They are followed by nucleotide frequencies (*f*) and rates of base substitutions (*r*) for each nucleotide pair. Relative values of instantaneous *r* should be considered when evaluating them. For simplicity, sum of *r* values is made equal to 1 for each model. For estimating ML values, a tree topology was automatically computed. The analysis involved 52 nucleotide sequences. Codon positions included were 1st+2nd+3rd+Noncoding. All positions with less than 95% site coverage were eliminated. That is, fewer than 5% alignment gaps, missing data, and ambiguous bases were allowed at any position. There were a total of 375 positions in the final dataset. Evolutionary analyses were conducted in MEGA6 [2]. 

*Abbreviations:* GTR: General Time Reversible; HKY: Hasegawa-Kishino-Yano; TN93: Tamura-Nei; T92: Tamura 3-parameter; K2: Kimura 2-parameter; JC: Jukes-Cantor.

1. Nei M. and Kumar S. Molecular Evolution and Phylogenetics. Oxford University Press, New York, 2000.

2. Tamura K, Stecher G, Peterson D, Filipski A, and Kumar S. MEGA6: Molecular Evolutionary Genetics Analysis version 6.0. *Mol Biol Evol.* 2013; *30*: 2725-2729.

Supplementary 2. Comparison of amino acid sequences of the hepervariable VP2 domain (aa 220-420) of reference, field isolates, and IBDV vaccine strains


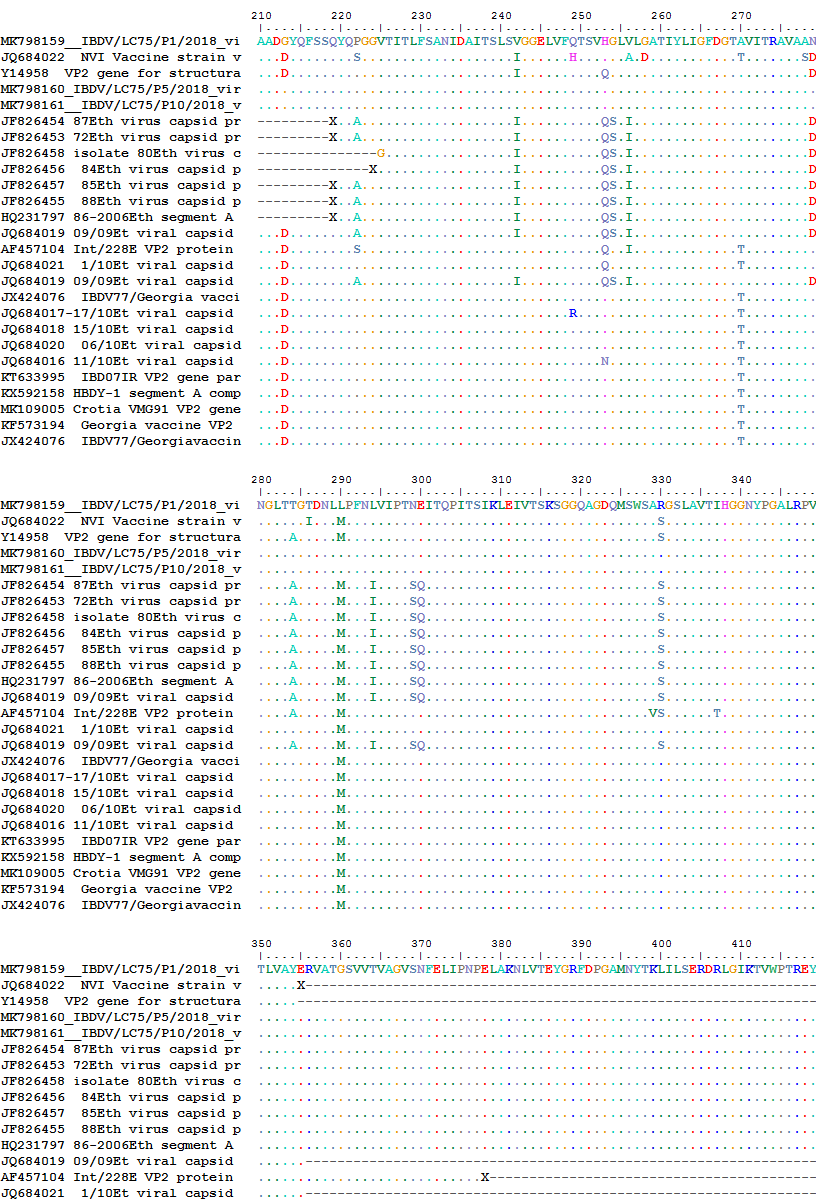

Supplement: Supplementary file 1 [file get_supplementary_file.php]
